# Supplementary material for: Grafting of cationic molecules to hyaluronic acid improves adsorption and cartilage lubrication
Source: Royal Society of Chemistry journal article supplement (doi:10.1039/d4bm00532e), 2024-01-01
Supplement: d4bm00532e1.pdf [file d4bm00532e1.pdf]

## Supplementary Information for

# **Grafting of Cationic Molecules to Hyaluronic Acid Improves Adsorption and Cartilage Lubrication**

Gavin Gonzales<sup>1</sup>, Jiaul Hoque<sup>2</sup>, Colin Kaeo<sup>1</sup>, Stefan Zauscher<sup>3</sup>, and Shyni Varghese<sup>1,2,3\*</sup>

<sup>1</sup>Department of Biomedical Engineering, Duke University, Durham, NC 27710, USA

<sup>2</sup>Department of Orthopaedic Surgery, Duke University School of Medicine, Durham, NC 27710, USA

<sup>3</sup>Department of Mechanical Engineering and Materials Science, Duke University, Durham, NC 27710, USA

\*To whom correspondence should be addressed:

E-mail: [shyni.varghese@duke.edu](mailto:shyni.varghese@duke.edu), Tel: +1-919-660-5273

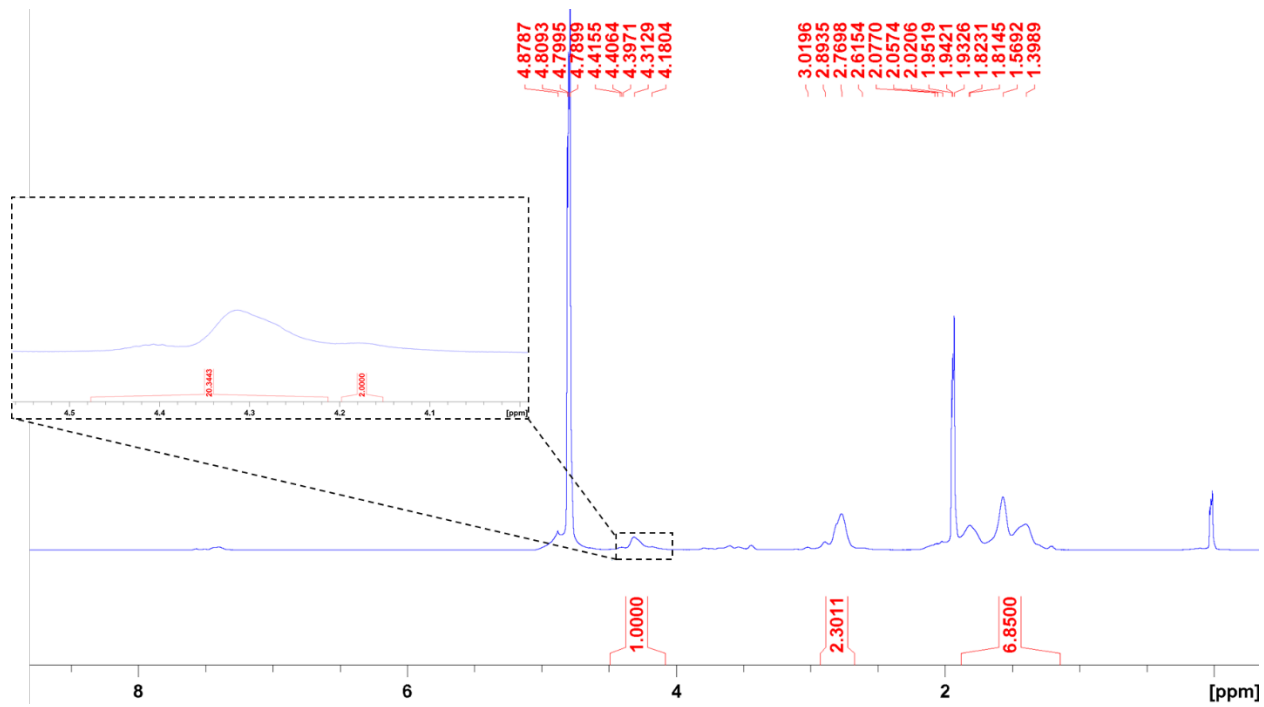

**Figure S1.** <sup>1</sup>H NMR Spectrum of fully deprotected core peptide recorded in D<sub>2</sub>O at 25 °C.

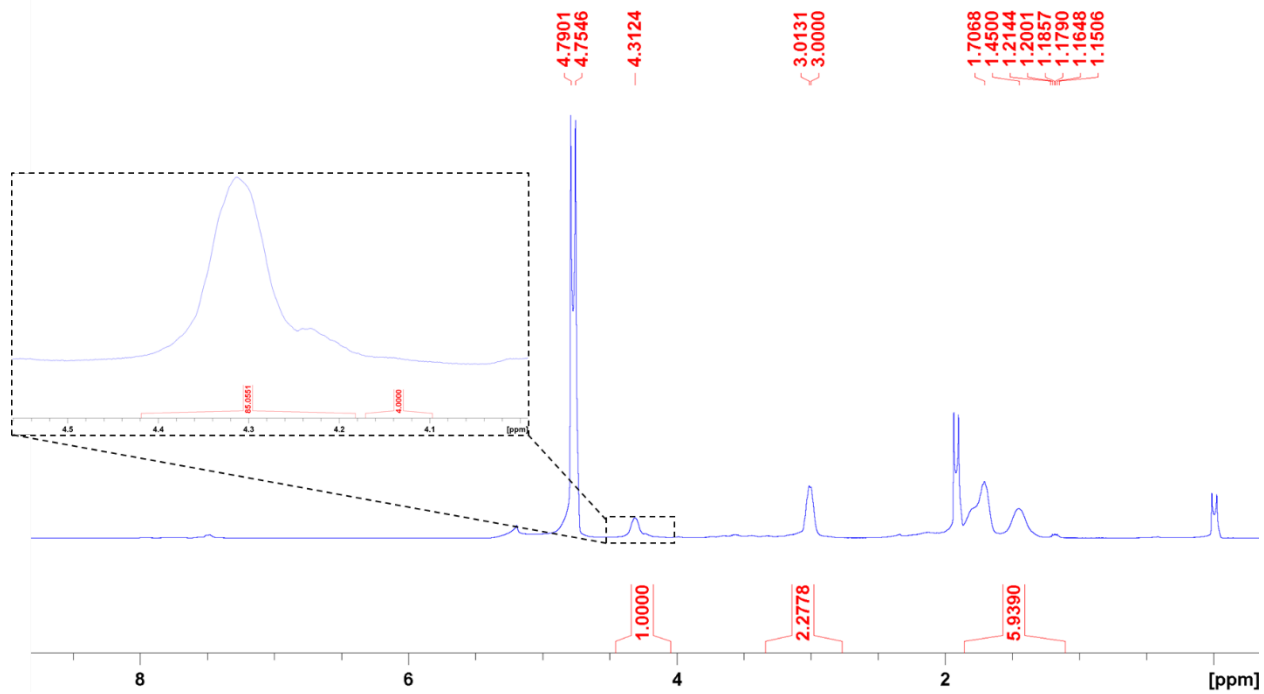

**Figure S2.** <sup>1</sup>H NMR Spectrum of fully deprotected G0 peptide recorded in D<sub>2</sub>O at 25 °C.

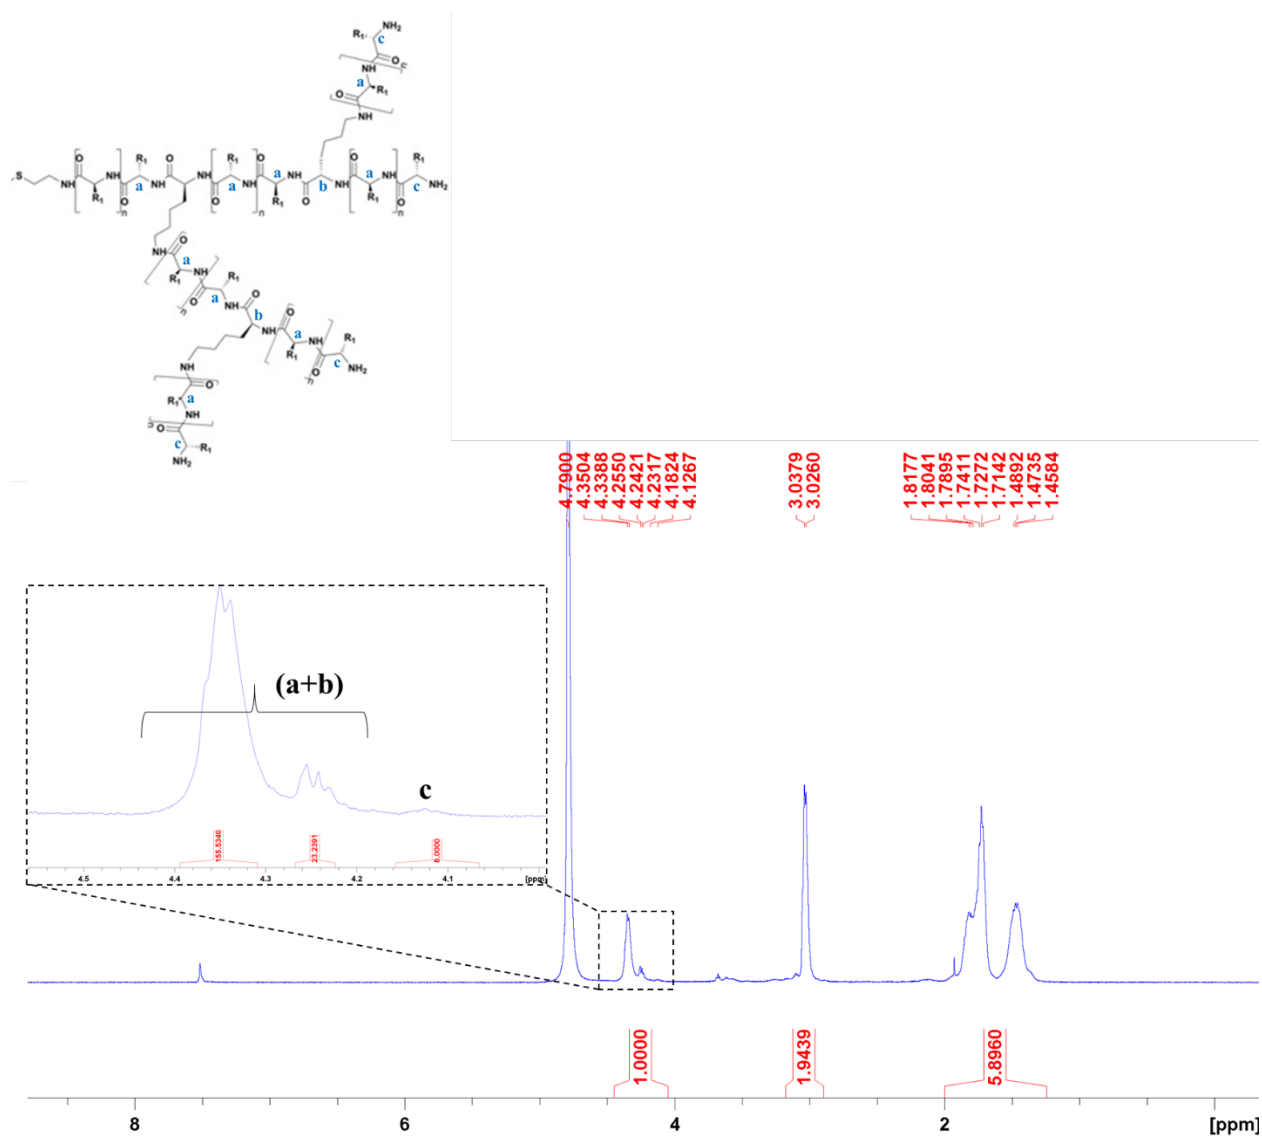

Figure S3. <sup>1</sup>H NMR Spectrum of fully deprotected G1 peptide recorded in D<sub>2</sub>O at 25 °C.

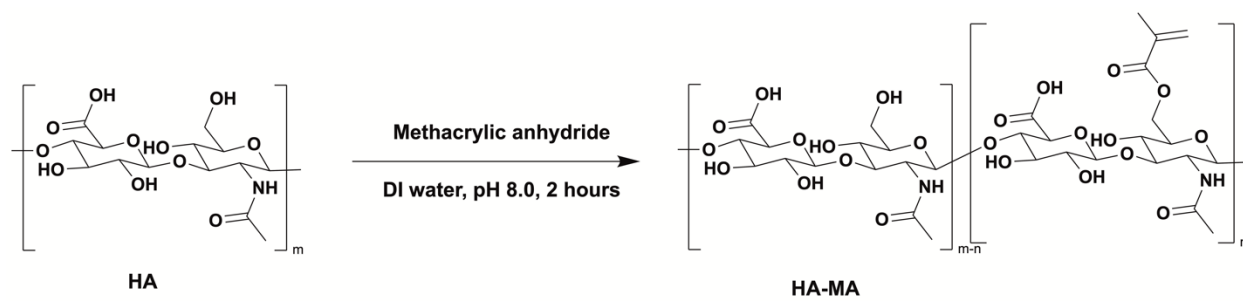

**Figure S4.** Synthesis of HA-MA from HA. Reaction scheme showing the incorporation of methacrylate groups in the HA by reacting HA with methacrylic anhydride.

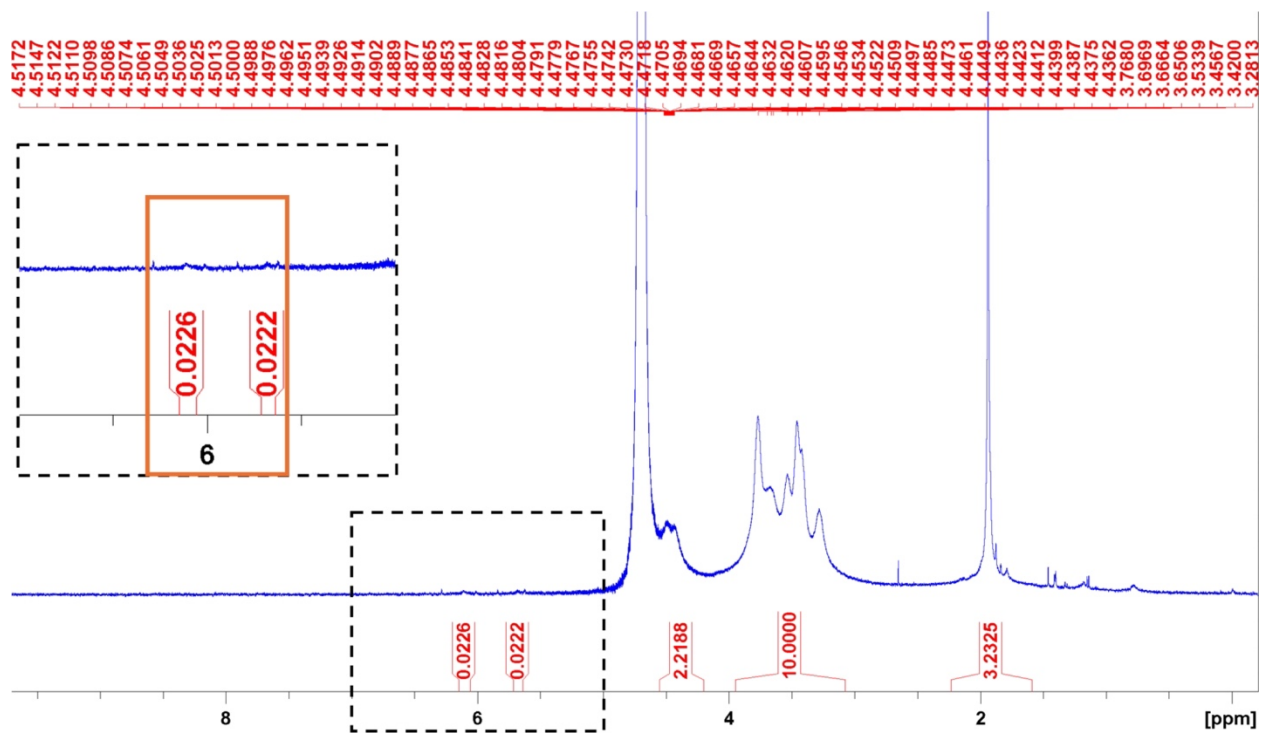

**Figure S5.** <sup>1</sup>H NMR Spectrum of HA-MA recorded in D<sub>2</sub>O at 25 °C. The box shows an expansion of the region from 4.25-6.5 ppm with the methacrylate protons of the HA-MA marked by the orange box.

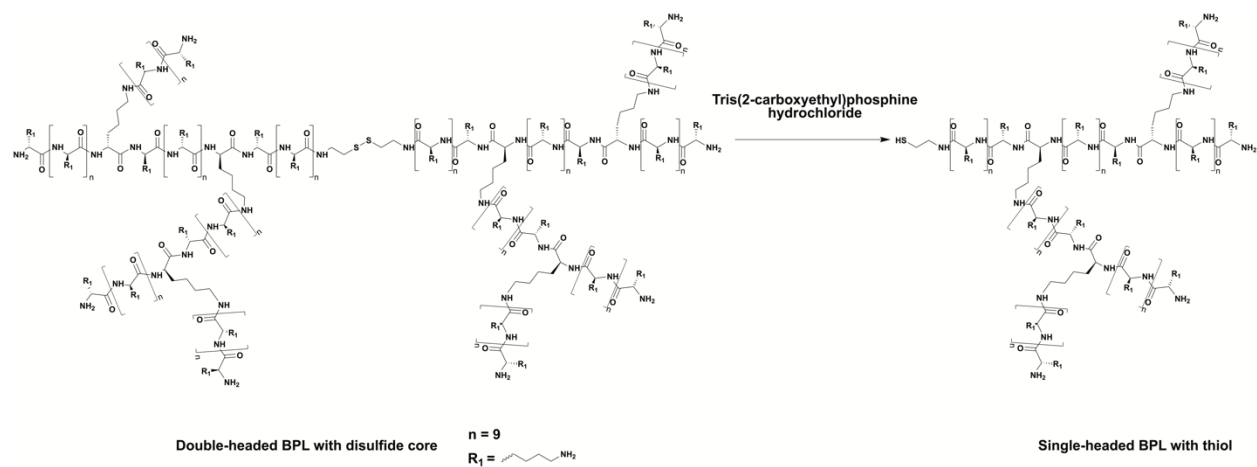

**Figure S6.** Reduction of disulfide bond in the double-headed BPL molecule.

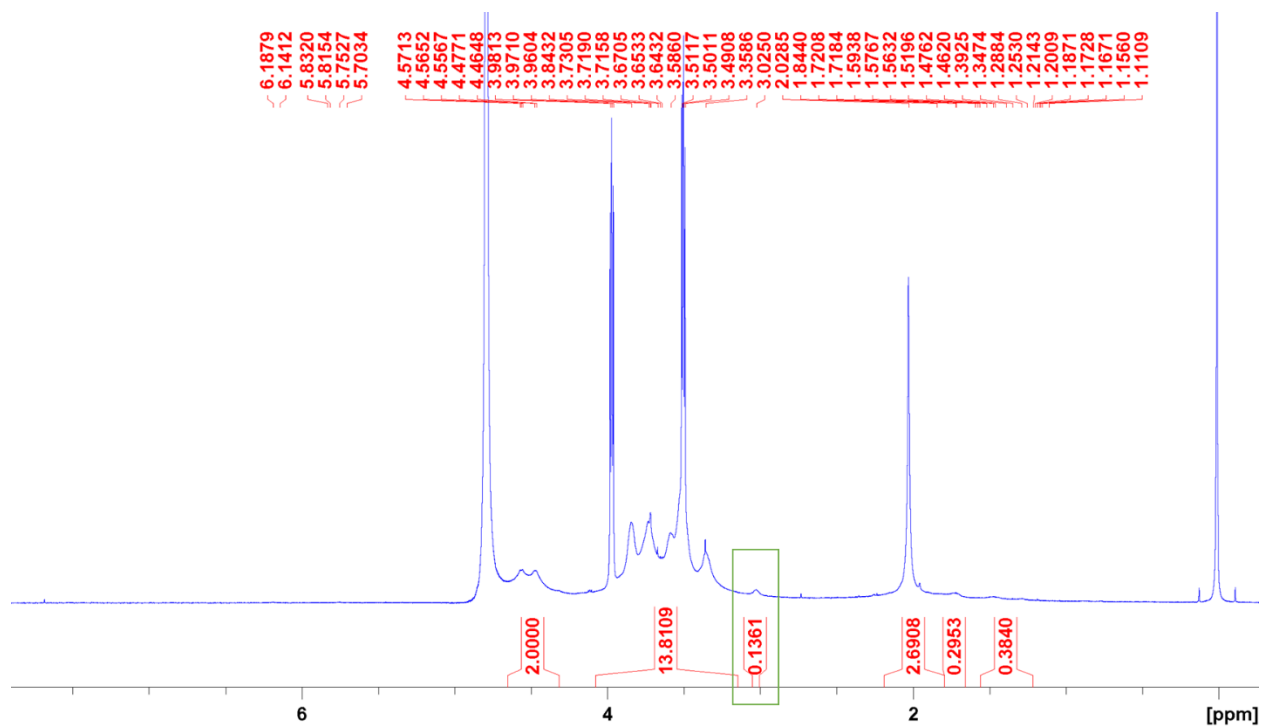

**Figure S7.**  $^1\text{H}$ NMR Spectrum of HA-2BPL recorded in  $\text{D}_2\text{O}$  at  $25\text{ }^\circ\text{C}$ . Peak at 3.025 ppm (marked with a green colored box) indicates the appearance of methylene protons adjacent to  $\text{NH}_2$  group ( $-\text{CH}_2\text{CH}_2\text{CH}_2\text{CH}_2\text{NH}_2$ ) of lysine unit from fully deprotected BPL.



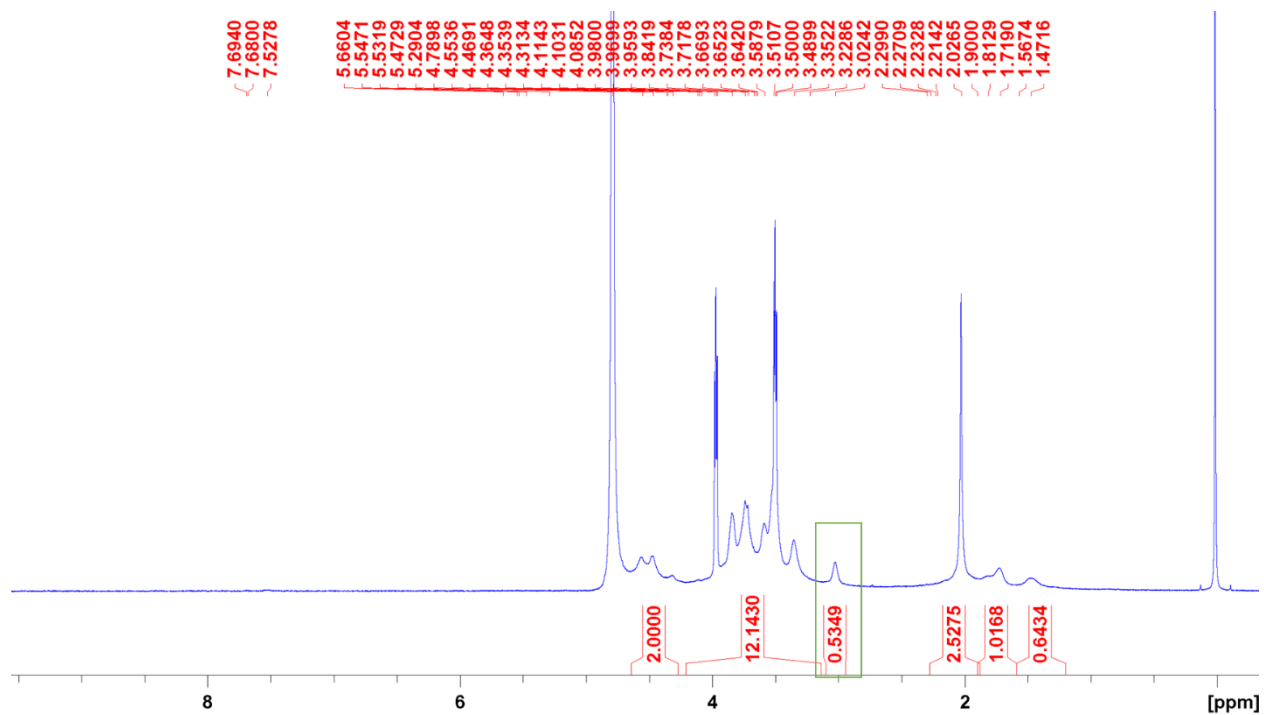

**Figure S8.**  $^1\text{H}$ NMR Spectrum of HA-8BPL recorded in  $\text{D}_2\text{O}$  at 25 °C. Peak at 3.024 ppm (marked with a green colored box) indicates the appearance of methylene protons adjacent to  $\text{NH}_2$  group ( $-\text{CH}_2\text{CH}_2\text{CH}_2\text{CH}_2\text{NH}_2$ ) of lysine unit from fully deprotected BPL.

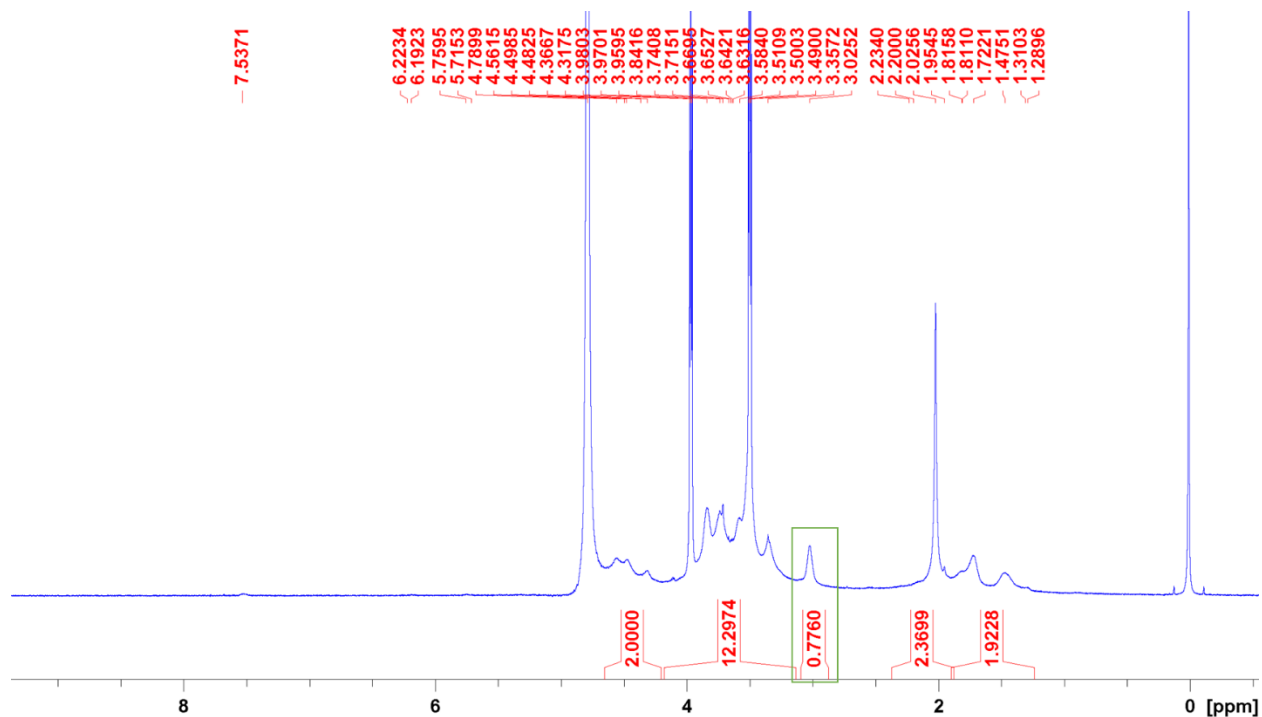

**Figure S9.**  $^1\text{H}$ NMR Spectrum of HA-12BPL recorded in  $\text{D}_2\text{O}$  at 25 °C. Peak at 3.025 ppm (marked with a green colored box) indicates the appearance of methylene protons adjacent to  $\text{NH}_2$  group ( $-\text{CH}_2\text{CH}_2\text{CH}_2\text{CH}_2\text{NH}_2$ ) of lysine unit from fully deprotected BPL.

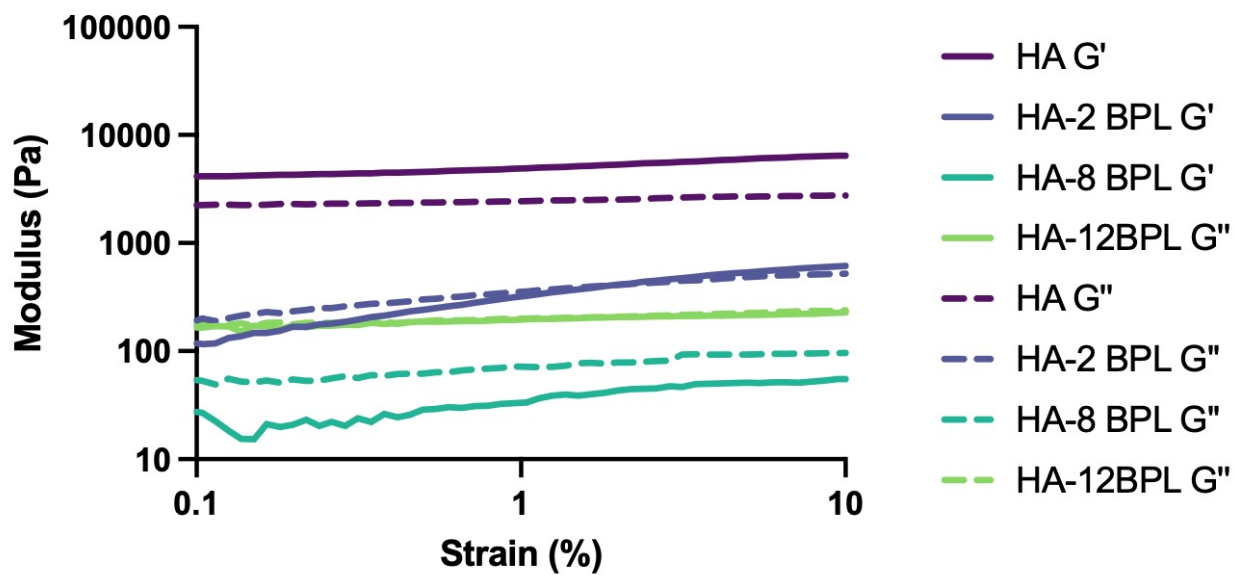

Figure S10. Strain sweep of HA and HA-BPL molecules.

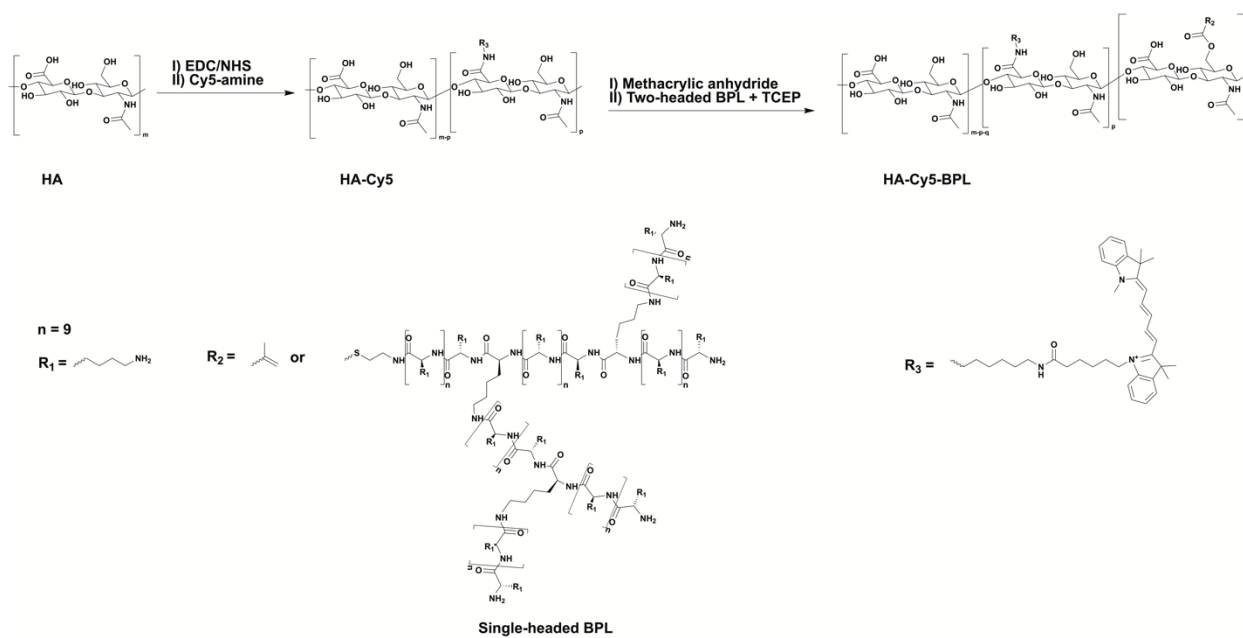

**Figure S11.** Synthesis of Cy5 containing HA-BPL molecules.

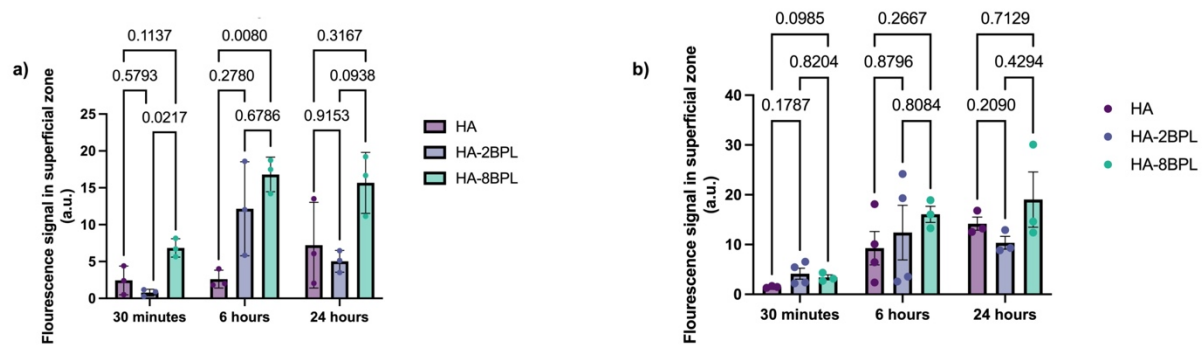

**Figure S12.** Adsorption of HA-BPL molecules to cartilage as a function of time. a) Penetration of HA BPL molecules in healthy cartilage explants. b) Penetration of HA BPL molecules in OA-mimetic cartilage explants.

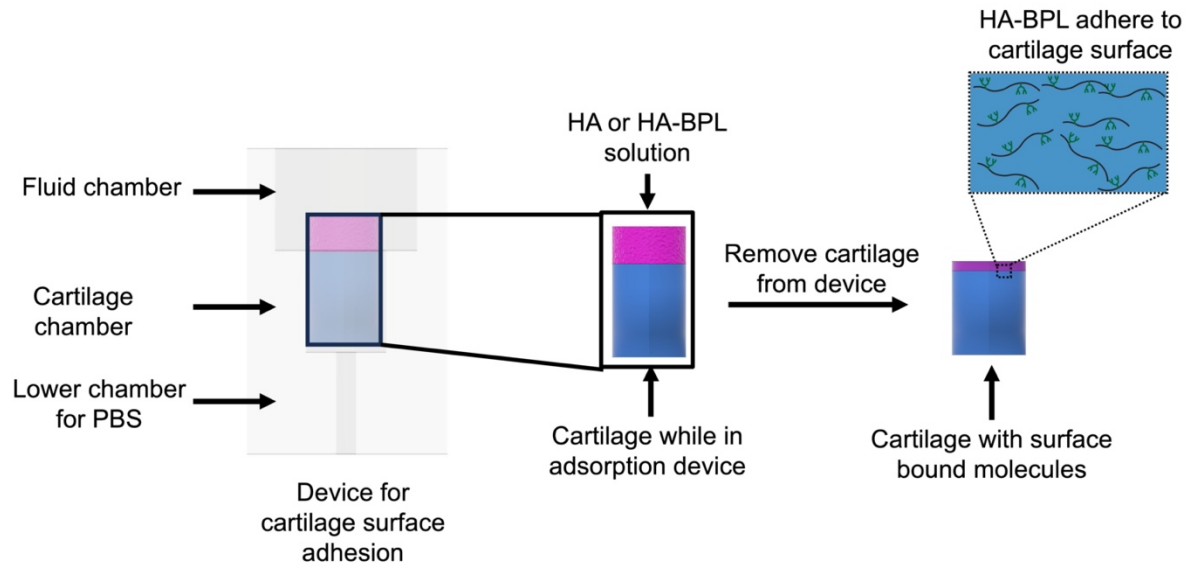

**Figure S13.** Schematic of device used to assess adsorption of HA and HA-BPL molecules to cartilage.

**Table S1.** Molecular characteristics of different generations

|      | Number of terminal lysine residues | Total number of branches/arms | <sup>a</sup> DP <sub>branch</sub> | <sup>b</sup> DP <sub>total</sub> |
|------|------------------------------------|-------------------------------|-----------------------------------|----------------------------------|
| Core | 2                                  | 2                             | 10                                | 20                               |
| G0   | 4                                  | 6                             | 10                                | 60                               |
| G1   | 8                                  | 14                            | 10                                | 140                              |

<sup>a,b</sup> Theoretical estimation of average number of lysine repeating units per branch (DP<sub>branch</sub>) and the total number average degree of polymerization (DP<sub>total</sub>)

<sup>a</sup> Yields determined gravimetrically after precipitation, filtration, and freeze-drying of the polypeptides.

**Table S2.** Results of the  $^1\text{H}$ NMR characterization of BPL molecules

| $^1\text{H}$ NMR Integrals |                                 |                 |                                                                 |                             |                            |
|----------------------------|---------------------------------|-----------------|-----------------------------------------------------------------|-----------------------------|----------------------------|
|                            | $I(\text{H}_a) + I(\text{H}_b)$ | $I(\text{H}_c)$ | $[I(\text{H}_a) + I(\text{H}_b) + I(\text{H}_c)]/I(\text{H}_c)$ | $\text{DP}_{\text{branch}}$ | $\text{DP}_{\text{total}}$ |
| Core                       | 20.3                            | 2               | 11.15                                                           | ~11.1                       | 22                         |
| G0                         | 85.0                            | 4               | 22.25                                                           | ~11.1                       | 89                         |
| G1                         | 178.76                          | 8               | 23.34                                                           | ~11.6                       | 187                        |

$I(\text{H}_a)$  = Integral for methine protons of the terminal lysine units from the core peptide

$I(\text{H}_b)$  = Integral for methine protons of the terminal lysine units from the G0 peptide

$I(\text{H}_c)$  = Integral for methine protons of the terminal lysine units from the G1 peptide
